CORRECTION

# Correction: A Meta-Analysis of the Association between *ESR1* Genetic Variants and the Risk of Breast Cancer

Taishun Li, Jun Zhao, Jiaying Yang, Xu Ma, Qiaoyun Dai, Hao Huang, Lina Wang, Pei Liu

The affiliation for the eighth author is incorrect. Pei Liu is not affiliated with #2 but with #1 Department of Epidemiology and Biostatistics, School of Public Health, Southeast University, Nanjing, China.

## Reference

1. Li T, Zhao J, Yang J, Ma X, Dai Q, Huang H, et al. (2016) A Meta-Analysis of the Association between *ESR1* Genetic Variants and the Risk of Breast Cancer. PLoS ONE 11(4): e0153314. <https://doi.org/10.1371/journal.pone.0153314> PMID: 27070141

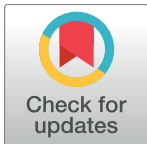

## OPEN ACCESS

**Citation:** Li T, Zhao J, Yang J, Ma X, Dai Q, Huang H, et al. (2018) Correction: A Meta-Analysis of the Association between *ESR1* Genetic Variants and the Risk of Breast Cancer. PLoS ONE 13(1): e0191579. <https://doi.org/10.1371/journal.pone.0191579>

**Published:** January 17, 2018

**Copyright:** © 2018 Li et al. This is an open access article distributed under the terms of the [Creative Commons Attribution License](https://creativecommons.org/licenses/by/4.0/), which permits unrestricted use, distribution, and reproduction in any medium, provided the original author and source are credited.
